In the article “The Application Value of 3D Model in Partial Nephrectomy of Varying Complexity” [Urol Int. 2025;109:251–9; <https://doi.org/10.1159/000542846>] by Li et al., the grant number “Scientific Research Project of Higher Education Institutions in Ningxia” was incorrectly given. The Funding Sources should read as follows.

### Funding Sources

This study was funded by grants from Scientific Research Project of Higher Education Institutions in Ningxia (No. NYG2024114), Talent Highland Project of the Ningxia Hui Autonomous Region, and Key Research and Development Projects of Ningxia Hui Autonomous Region (No. 2020BFH03001).
